# Supplementary material for: A retrospective cohort study of the utility of the modified early warning score for interfacility transfer of patients with traumatic injury
Source: PubMed Central journal article supplement — BMJ Open. 2017 May 9;7(5):e016143. doi: 10.1136/bmjopen-2017-016143 (PMC5623387; doi:10.1136/bmjopen-2017-016143), 2017-05-09
Supplement: bmjopen-2017-016143.draft_revisions.pdf [file bmjopen-2017-016143.draft_revisions.pdf]

# BMJ Open

## UTILITY OF THE MODIFIED EARLY WARNING SCORE FOR INTERFACILITY TRANSFER OF PATIENTS WITH TRAUMATIC INJURY

|                                 |                                                                                                                                                                                                                                                                                                                                                                 |
|---------------------------------|-----------------------------------------------------------------------------------------------------------------------------------------------------------------------------------------------------------------------------------------------------------------------------------------------------------------------------------------------------------------|
| Journal:                        | <i>BMJ Open</i>                                                                                                                                                                                                                                                                                                                                                 |
| Manuscript ID                   | bmjopen-2017-016143                                                                                                                                                                                                                                                                                                                                             |
| Article Type:                   | Research                                                                                                                                                                                                                                                                                                                                                        |
| Date Submitted by the Author:   | 26-Jan-2017                                                                                                                                                                                                                                                                                                                                                     |
| Complete List of Authors:       | Salottolo, Kristin; Swedish Medical Center, Trauma Research<br>Carrick, Matthew; The Medical Center of Plano, Trauma research Dept<br>Johnson, Jacob; The Medical Center of Plano, Trauma research Dept<br>Gamber, Mark; The Medical Center of Plano, Trauma research Dept<br>Bar-Or, David; Swedish Medical Center, Trauma Research; Swedish<br>Medical Center |
| <b>Primary Subject Heading</b>: | Emergency medicine                                                                                                                                                                                                                                                                                                                                              |
| Secondary Subject Heading:      | Medical management, Surgery                                                                                                                                                                                                                                                                                                                                     |
| Keywords:                       | ACCIDENT & EMERGENCY MEDICINE, Adult intensive & critical care < INTENSIVE & CRITICAL CARE, TRAUMA MANAGEMENT                                                                                                                                                                                                                                                   |
|                                 |                                                                                                                                                                                                                                                                                                                                                                 |

SCHOLARONE™  
Manuscripts

1  
2  
3 **UTILITY OF THE MODIFIED EARLY WARNING SCORE FOR INTERFACILITY**  
4  
5 **TRANSFER OF PATIENTS WITH TRAUMATIC INJURY**  
6  
7

8 Kristin Salottolo, MPH<sup>1,2,3,4</sup>; Matthew Carrick, MD<sup>3</sup>; Jacob Johnson, RN<sup>3</sup>; Mark Gamber, DO<sup>3</sup>;

9  
10 David Bar-Or, MD<sup>1,2,3,4</sup>  
11

12 <sup>1</sup>Trauma Research Department, Swedish Medical Center, Englewood, CO 80113 USA  
13

14 <sup>2</sup>Trauma Research Department, St. Anthony Central Hospital, Denver, CO 80204 USA  
15

16 <sup>3</sup>Trauma Research Department, The Medical Center of Plano, Plano, TX 75075 USA  
17

18 <sup>4</sup>Trauma Research Department, Penrose Hospital, Colorado Springs, CO 80907 USA  
19  
20  
21  
22  
23

24 **Word Count:** 2,371  
25

26 **Abstract word count:** 296  
27

28 **Tables/figures:** 5  
29

30 **Keywords:** Accident and emergency medicine; adult intensive and critical care; trauma  
31  
32 management  
33  
34  
35  
36  
37  
38

39 **Author of correspondence and reprints:**  
40

41 David Bar-Or, MD  
42

43 [dbaror@ampiopharma.com](mailto:dbaror@ampiopharma.com)  
44

45 500 E. Hampden Ave, Suite 4-454  
46  
47

48 Swedish Medical Center, Englewood, CO 80113 USA  
49

50 Office: (303) 788-4089  
51  
52  
53  
54  
55  
56  
57  
58  
59  
60

**ABSTRACT**

**Objective:** The modified early warning score (MEWS) is a “track and trigger” score utilizing routine physiologic vital signs. The objective is to determine if the pre-transfer MEWS can be used for predicting outcomes in patients with traumatic injury requiring interfacility transfer to higher levels of care.

**Design, setting, participants:** Retrospective study of consecutively transferred patients with traumatic injury into a level II trauma center from 2013-2014.

**Interventions:** None.

**Outcome measures:** Mortality, ICU admission, operative procedure, MEWS deterioration in-transit, air transport interfacility, and secondary overtriage (low injury severity, LOS < 1 day, discharged home). The association between the pre-transfer MEWS and outcomes were analyzed with Cochran-Armitage trend tests, ROC curves, and univariate logistic regression.

**Results:** There were 587 transferred patients; outcomes were reported in 339 patients with complete data on all 5 vital signs used to calculate the MEWS. The MEWS ranged from 0-9 (median of 1). There was a significant linear relationship between MEWS and study outcomes, especially mortality, ICU admission, and air medical transport ( $p < 0.001$  for all). A threshold score  $\geq 4$  was identified by ROC analysis; 11.2% of patients had MEWS  $\geq 4$ . Outcomes were significantly worse in patients with MEWS  $\geq 4$  vs.  $< 4$ : mortality (26.2% vs. 3.0%, OR = 11.59,  $p < 0.001$ ); ICU admission (73.7% vs. 47.2%, OR = 3.14,  $p=0.003$ ); air transfer (42.1% vs. 15.6%, OR=3.93,  $p < 0.001$ ). The MEWS was not associated with surgery, in-transit MEWS deterioration, or secondary overtriage.

1  
2  
3 **Conclusion:** While MEW scores were low for patients transferred interfacility, a pre-transfer  
4  
5 MEWS  $\geq 4$  may be utilized by the receiving facility for predicting mortality, air transport, and  
6  
7  
8 ICU resource utilization. In the interfacility transport setting, the MEWS may be useful for  
9  
10 identifying patients with less obvious need for transfer or requiring more expeditious transfer.  
11  
12  
13  
14  
15  
16  
17  
18  
19  
20  
21  
22  
23  
24  
25  
26  
27  
28  
29  
30  
31  
32  
33  
34  
35  
36  
37  
38  
39  
40  
41  
42  
43  
44  
45  
46  
47  
48  
49  
50  
51  
52  
53  
54  
55  
56  
57  
58  
59  
60

For peer review only

1  
2  
3 **Article Summary:** Strengths and limitations of this study  
4

- 5  
6 • **Strength:** The utility of the modified early warning score (MEWS), a “track and trigger”  
7  
8 score comprised of common physiologic vital signs, has been previously described for  
9  
10 risk deterioration in ED settings, but its utility has not been examined during interfacility  
11  
12 transfer.  
13
- 14 • **Limitation:** Emergency physicians and EMS personnel did not prospectively utilize the  
15  
16 MEWS during the study period so our findings need to be considered in combination  
17  
18 with clinical judgment.  
19
- 20 • **Limitation:** There was a considerable amount of missing vital signs at the transferring  
21  
22 facility, resulting in nearly half of patients being removed from our outcomes analysis,  
23  
24 although there were no demographic or outcome differences in patients with missing  
25  
26 versus complete vital signs.  
27  
28
- 29 • **Limitation:** The acuity of the patients was low, which may have prevented more robust  
30  
31 analyses between MEWS and outcomes.  
32  
33  
34  
35  
36  
37  
38  
39  
40  
41  
42  
43  
44  
45  
46  
47  
48  
49  
50  
51  
52  
53  
54  
55  
56  
57  
58  
59  
60

## INTRODUCTION

Traumatic injury is the leading cause of death in persons under 45 years of age.<sup>1</sup> Emergency medical service (EMS) personnel transported nearly 5 million patients with traumatic injury in 2008 alone.<sup>2</sup> The pre-hospital care, triage and transport of patients with traumatic injury to a trauma center are determined by protocols and guidelines published by the American College of Surgeons (ACS) Committee on Trauma<sup>3</sup> and the Centers for Disease Control and Prevention.<sup>2</sup> However, not all injuries are immediately obvious, and patients are occasionally undertriaged to a lower-level or non-trauma center that requires interfacility EMS transport to a higher-level trauma center for care.

The mode of EMS transport interfacility is determined and requested by the transferring emergency physician. Communication between the transferring physician and the receiving trauma surgeon includes a review of physiologic status, initial management, and discussion on the optimal timing of transfer, such as stabilizing patients prior to transfer. EMS agencies are staffed with providers having a range of training and experience dictating the scope of tasks they can perform, from administration of medications, use of medical devices, performing cardiopulmonary resuscitation, initiating ventilation and intubation, and other monitoring techniques. While there are some criteria to help the transferring physician determine if the trauma patient should be transferred, for example patients with carotid or vertebral injuries, cardiac rupture, and grade IV or V liver injuries,<sup>3</sup> there are no solid guidelines on if, when, and how a patient should be transferred.

The modified early warning score (MEWS) is a “track and trigger” score used for recognizing patients who are at risk for deterioration and determines degree of illness of the patient.<sup>4</sup> The initial validation of the MEWS was performed in 709 emergency department

1  
2  
3 patients and identified MEWS  $\geq 5$  was associated with mortality and admission to the intensive  
4  
5 care unit (ICU).<sup>5</sup>  
6  
7

8 Our objectives were to determine whether the MEWS can be used in the interfacility  
9  
10 transport setting for patients with traumatic injury to detect patients potentially requiring higher  
11  
12 levels of care. Specifically, we examined whether the pre-transfer MEWS was associated with  
13  
14 poor clinical outcomes, transport mode, and secondary overtriage.  
15  
16  
17

## 18 19 20 **METHODS**

### 21 22 **Design, setting and participants**

23  
24 This was a retrospective cohort study that included all consecutively admitted trauma patients  
25  
26 transferred into an ACS verified level II trauma center from another healthcare facility between  
27  
28 January 1, 2013 and December 31, 2014. The patient populations were identified from the  
29  
30 trauma registry called TraumaBase® (CDM, Conifer, CO), which is a registry used by the  
31  
32 hospital and the State of Texas to track patients with traumatic injury for epidemiology and  
33  
34 prevention studies as well as for quality assurance and quality improvement. Patients less than 18  
35  
36 years of age were excluded. We also excluded patients missing all five vital signs used to  
37  
38 calculate the MEWS (n=65, 10.0% of patients). This study received institutional review board  
39  
40 approval with waiver of informed consent.  
41  
42  
43  
44

### 45 46 **Modified Early Warning Score**

47  
48 The MEWS is derived from 5 common physiologic vital signs of systolic blood pressure (SBP,  
49  
50 mm Hg), heart rate (HR, beats per minute), respiratory rate (RR, breaths per minute),  
51  
52 temperature (T, Celcius), and AVPU score ("alert, voice, pain, unresponsive"), **Figure 1**. The  
53  
54 Glasgow coma scale is favored to the AVPU in traumatic injury, and the AVPU was derived  
55  
56  
57  
58  
59  
60

1  
2  
3 from the GCS as follows: A=14-15, V=9-13, P = 4-8, U = 3. The MEWS was calculated as the  
4 total of the five subcomponent scores (**figure 1**). Scores range from 0 to a maximum of 14.  
5  
6

7  
8 The pre-transfer MEWS was calculated using vital signs from the transferring facility  
9 (obtained from the transfer facility record), before interfacility transport. The post-transfer  
10 MEWS was calculated from vital signs collected on arrival to the receiving facility.  
11  
12

### 13 **Covariates and outcomes**

14  
15 Clinical outcomes included in-hospital mortality, intensive care unit (ICU) admission, surgical  
16 procedure, EMS transport mode (air medical vs. ground transport), MEWS deterioration (an  
17 increase in MEWS during transit, calculated as the difference between pre-transfer MEWS and  
18 post-transfer MEWS), and secondary overtriage (injury severity score (ISS) < 10, hospital LOS <  
19 1 day, and discharged home).  
20  
21  
22  
23  
24  
25  
26  
27  
28

29 The following demographic and clinical information was abstracted from the registry:  
30 vital sign information (vital sign location, timing, and values before interfacility transport and on  
31 arrival at the receiving facility); demographics (age, gender, race); injury severity measures  
32 (abbreviated injury scale score, injury severity score (ISS), anatomic location of injury), and  
33 cause of injury. We also examined the occurrence of in-transit events, defined as a significant  
34 change in vital signs during transport (any normal to abnormal change in SBP, HR, RR, T, and  
35 GCS) or procedures performed in transit (e.g. fluid bolus, new or significant change in  
36 medication, sedation, or paralytics, placement of chest tube or central line, needle  
37 decompression). Information on in-transit events were abstracted from detailed, scanned EMS  
38 run reports, which were only available in 149 charts.  
39  
40  
41  
42  
43  
44  
45  
46  
47  
48  
49  
50  
51

### 52 **Analysis**



1  
2  
3 The association between pre-transfer MEWS and outcomes were examined with Cochran-  
4 Armitage trend tests. Receiver operator characteristic (ROC) curves were used to identify an  
5 optimal threshold score; we examined ROC curves for mortality and ICU admission, which were  
6 the outcomes used in the initial validation of the MEWS.<sup>5</sup> This threshold score was examined in  
7 separate logistic regression models for each of our study outcomes to estimate the unadjusted  
8 odds of the threshold score for the outcome. The threshold score was also used to examine the  
9 proportion of patients who did not meet the physiologic criteria outlined in the Guidelines for  
10 triage to a trauma center of GCS  $\leq 13$ , SBP  $\leq 90$  mm Hg, and respirations  $< 10$  or  $> 29$   
11 breaths/min signaling potential, impending deterioration.<sup>1 3</sup>

12  
13  
14  
15  
16  
17  
18  
19  
20  
21  
22  
23  
24  
25  
26  
27  
28  
29  
30  
31  
32  
33  
34  
35  
36  
37  
38  
39  
40  
41  
42  
43  
44  
45  
46  
47  
48  
49  
50  
51  
52  
53  
54  
55  
56  
57  
58  
59  
60

SAS version 9.4 (SAS Institute, Cary, NC) was used for all analyses, and  $p \leq 0.05$  was considered statistically significant.

## RESULTS

### Patient characteristics and outcomes

There were 587 transferred patients in our study. The population had a median (IQR) age of 56 years (37-74), 60% were male, and the most common cause of injury was due to fall (57%), followed by a vehicular accident (28%). Nearly half of patients suffered a head injury (46%), although the acuity of injuries was not severe: the median GCS was 15 (15-15) and the ISS was 10 (5-17). Overall, 18% were transported interfacility by air medical services. The average distance traveled was 23 miles (range: 7 – 79 miles).

The rates of our study outcomes are shown in **table 1**. There was low mortality of less than 6% among our transferred trauma population, although half of patients were admitted to the ICU and 35% required surgery. Additionally, 17.4% experienced an in-transit event. The most

1  
2  
3 common in-transit events were development of tachycardia or an abnormal RR (n=6 each),  
4  
5 followed by development of hypotension (< 90mm Hg, n=4), administration of fluid bolus (n=4),  
6  
7 and GCS decline of two or more points (n=3).  
8  
9

### 10 **Modified early warning score**

11  
12 The majority of patients (90%) were not missing any vital signs post-transfer. However, 42%  
13  
14 (n=248) were missing at least one vital sign pre-transfer (83% of those patients were missing  
15  
16 only 1 vital sign). Thus, only 58% of patients (n=339) had complete data for all 5 vital signs.  
17  
18

19  
20 We examined whether there were differences in demographics, clinical characteristics,  
21  
22 and outcomes in patients with complete vital sign data (n=339) vs. missing vital sign(s) (n=248),  
23  
24 **table 1**. There were no differences in any covariate or in any study outcome. Still, to be  
25  
26 conservative we analyzed the association between pre-transfer MEWS and outcomes in those  
27  
28 with complete vital sign data only (n=339), rather than using multiple imputation to calculate an  
29  
30 imputed MEWS in patients with missing vital sign(s).  
31  
32

### 33 **MEWS relationship to outcomes**

34  
35 The median (IQR) MEWS score was 1 (1-2). As shown in **table 2**, the pre-transfer MEWS  
36  
37 showed a significant, linear relationship with study outcomes of mortality, ICU admission, and  
38  
39 air transport. The pre-transfer MEWS was borderline significant for predicting a surgical  
40  
41 procedure.  
42  
43  
44

45  
46 Threshold scores were determined with ROC curves (**figure 2**). The ROC curve for  
47  
48 mortality was clinically and statistically significant (AUROC: 0.79 (95% CI: 0.74-0.83, p <  
49  
50 0.001), identifying a threshold MEWS  $\geq 4$  for predicting mortality with a high specificity of 91.3  
51  
52 (92% of survivors were correctly identified by a pre-transfer MEWS < 4) and good sensitivity of  
53  
54 52.6 (53% of patients who expired were correctly identified by a MEWS  $\geq 4$ ), figure 2a. The  
55  
56  
57  
58  
59  
60

1  
2  
3 ROC curve for ICU admission was weaker but still statistically significant (AUROC: 0.56 (95%  
4  
5 CI: 0.51-0.62, p=0.02), demonstrating specificity of 94.1 and sensitivity of 16.5 with a threshold  
6  
7 MEWS  $\geq$  4 on ROC analysis, figure 2b.  
8  
9

10  
11 When the threshold score  $\geq$  4 was modeled for our outcomes, the pre-transfer MEWS  
12  
13 continued to show a significant association with study outcomes of mortality, ICU admission,  
14  
15 and air transport (**table 3**).  
16

17  
18 In patients with MEWS  $\geq$  4, 45% (17/38) did not have abnormal physiologic vital signs  
19  
20 signaling triage to a trauma center by the ACS COT and CDC decision guidelines; further, 63%  
21  
22 (12/19) of patients with a MEWS=4 would not have met the physiologic criteria outlined in the  
23  
24 Guidelines. Outcomes in these twelve patients include one death, seven admissions to the ICU,  
25  
26 five patients requiring surgery, but only three patients transferred by air. Ninety-five percent  
27  
28 (286/301) of patients with MEWS  $<$  4 did not have abnormal vital signs per the guidelines.  
29  
30  
31  
32  
33

## 34 DISCUSSION

35  
36 Our study examined patients with traumatic injury requiring interfacility transfer, demonstrating  
37  
38 that a MEWS  $\geq$  4 calculated prior to interfacility transport is associated with mortality, ICU  
39  
40 admission, and air medical transport. In the interfacility transport setting, the MEWS may act as  
41  
42 a more holistic measure that may lessen the chance of underestimating a poor clinical outcome  
43  
44 and delaying or not transferring a patient appropriately. While it may seem obvious that out-of-  
45  
46 range vital signs would increase the odds of an unfavorable outcome, only 21 of 38 patients with  
47  
48 MEWS  $\geq$  4 would have met abnormal physiologic criteria by the ACS COT and CDC decision  
49  
50 guidelines.<sup>1 3</sup> In this setting, the MEWS may be useful for identifying patients with less obvious  
51  
52 need for transfer.  
53  
54  
55  
56  
57  
58  
59  
60

1  
2  
3 The main limitation of the study is that emergency physicians and EMS personnel did not  
4 prospectively utilize the MEWS during the study period so our findings need to be considered in  
5 combination with clinical judgment. Fullerton et al. observed that the MEWS in combination  
6 with clinical judgment increases the utility of the MEWS in a pre-hospital setting.<sup>4</sup> At least one  
7 study reported that implementing the MEWS in a trauma setting did not result in a statistically  
8 significant reduction in mortality ( $p=0.09$ ).<sup>6</sup> A prospective study that factors in clinical judgment  
9 will need to validate this threshold of  $\geq 4$  to determine if it leads to more appropriate transfer and  
10 improved outcomes.  
11  
12  
13  
14  
15  
16  
17  
18  
19  
20  
21

22 Additional limitations are as follows: There was a considerable amount of missing vital  
23 sign data at the transferring facility, resulting in 47% of patients being removed from our  
24 outcomes analysis. While there were no differences in the characteristics or outcomes of patients  
25 with complete data and patients with incomplete data, there may be some residual bias in  
26 excluding patients with one or more missing vital signs. This limitation also suggests a need for  
27 more efficient, routine collection of pre-transport vital signs and EMS reports to receiving  
28 facilities. Next, the acuity of the patients was low, which may have prevented more robust  
29 analyses between MEWS and outcomes. The median pre-transfer MEWS was only 1. This might  
30 not be a limitation as much as it suggests that guidelines for the pre-hospital triage and transport  
31 of patients minimizes over- and under-triage of trauma patients. Further study is needed to  
32 examine the MEWS for inter-hospital transport to level I trauma centers. Patients transferred into  
33 level I trauma centers theoretically have higher acuity injuries and more severe MEWS pre-  
34 hospital, which may help with the robustness of these analyses. Finally, the AVPU component of  
35 the MEWS score was estimated from the GCS. There are no standard criteria for estimating GCS  
36 from AVPU;<sup>7-11</sup> using a different cut-off might result in different MEWS scores.  
37  
38  
39  
40  
41  
42  
43  
44  
45  
46  
47  
48  
49  
50  
51  
52  
53  
54  
55  
56  
57  
58  
59  
60

1  
2  
3 Literature published within the past few years have identified a range of MEWS values  
4 associated with poor outcomes. Such studies include a pre-hospital MEWS  $\geq 3$  for requiring a  
5 life-saving intervention,<sup>12</sup> MEWS  $\geq 5$  with early mortality in the ED,<sup>13</sup> MEWS  $\geq 6$  for mortality  
6 in the ICU,<sup>14</sup> MEWS  $\geq 7$  for rapid response team and cardiac arrest in the ED.<sup>15</sup> Still others have  
7 used the MEWS  $\geq 5$  identified by Subbe et al. and examined this threshold in other settings, such  
8 as in developing countries.<sup>16</sup> A MEWS threshold  $\geq 4$  was associated with poor outcomes in  
9 patients requiring interfacility transfer in our study. Higher scores may lead to more efficient  
10 secondary triage and transfer of patients to a higher-level trauma center who are at risk for  
11 deterioration and poor outcomes. Using an integrated score such as the MEWS might help avoid  
12 situations where a clinician might dismiss a potentially problematic clinical presentation as not  
13 requiring an interfacility transfer. Additional applications of the MEWS include determining  
14 when to transfer a patient: a MEWS  $\geq 4$  suggests expeditious transfer, rather than a thorough  
15 work-up until the discovery of an injury that is not admissible at the transferring facility. Another  
16 example is from a bed capacity sense: the house supervisor may be able to determine if a patient  
17 may need a bed, and if the ICU is full at the transferring or receiving facility.

18  
19  
20  
21  
22  
23  
24  
25  
26  
27  
28  
29  
30  
31  
32  
33  
34  
35  
36  
37  
38  
39 The EAST practice management guidelines on the triage of the trauma patient describe  
40 77 articles of pre-hospital triage of adult patients, 9 articles of pre-hospital triage of pediatric  
41 patients, and 16 articles of in-hospital triage of trauma patients.<sup>17</sup> There are no guidelines or  
42 referenced articles on the *interfacility* triage and transport of patients. Our findings contribute to  
43 the literature in that we identify a simple score utilizing common vital signs that can aid in early  
44 recognition of patients at risk for poor clinical outcomes for triage and transport in the inter-  
45 facility setting. Our findings suggest the pre-transfer MEWS can aid in interfacility triage and  
46 transport, to be utilized for predicting in-hospital mortality, allotment of ICU resources, and for  
47  
48  
49  
50  
51  
52  
53  
54  
55  
56  
57  
58  
59  
60

1  
2  
3 identifying patients requiring interfacility transport by air, particularly with scores  $\geq 4$ . The pre-  
4 transfer MEWS appeared to be less useful in identifying secondary overtriage and risk for  
5  
6 deterioration during interfacility transfer, although the utility of the pre-transfer MEWS for these  
7  
8 outcomes requires further study in populations with higher acuity injuries.  
9  
10  
11  
12  
13  
14  
15  
16  
17  
18  
19  
20  
21  
22  
23  
24  
25  
26  
27  
28  
29  
30  
31  
32  
33  
34  
35  
36  
37  
38  
39  
40  
41  
42  
43  
44  
45  
46  
47  
48  
49  
50  
51  
52  
53  
54  
55  
56  
57  
58  
59  
60

For peer review only

1  
2  
3  
4  
5  
6  
7  
8  
9  
10  
11  
12  
13  
14  
15  
16  
17  
18  
19  
20  
21  
22  
23  
24  
25  
26  
27  
28  
29  
30  
31  
32  
33  
34  
35  
36  
37  
38  
39  
40  
41  
42  
43  
44  
45  
46  
47  
48  
49  
50  
51  
52  
53  
54  
55  
56  
57  
58  
59  
60

## Tables

**Table 1.** Descriptive statistics by study population, defined by vital sign missingness

| % (n)                        | All 5 vital signs available (n=339) | Missing vital sign(s) (n=248) | P value |
|------------------------------|-------------------------------------|-------------------------------|---------|
| <b>Demographics</b>          |                                     |                               |         |
| Age, years*                  | 54 (35-74)                          | 57 (40.5-78)                  | 0.05    |
| Male Gender                  | 62.2 (211)                          | 56.9 (141)                    | 0.19    |
| White race                   | 73.5 (249)                          | 78.2 (194)                    | 0.18    |
| Cause of injury              |                                     |                               | 0.89    |
| Vehicular                    | 29.2 (99)                           | 26.2 (65)                     |         |
| Fall                         | 55.5 (188)                          | 58.1 (144)                    |         |
| Recreational                 | 2.7 (9)                             | 2.4 (6)                       |         |
| GSW / Homicide               | 7.1 (24)                            | 6.5 (16)                      |         |
| Other                        | 5.6 (19)                            | 6.9 (17)                      |         |
| Injury severity score*       | 10 (5-17)                           | 10 (5-17)                     | 0.71    |
| Head injury                  | 44.0 (149)                          | 48.9 (121)                    | 0.25    |
| Neck or spine injury         | 14.5 (49)                           | 16.5 (41)                     | 0.49    |
| Chest injury                 | 9.7 (33)                            | 9.7 (24)                      | 0.98    |
| Limb injury                  | 27.7 (94)                           | 25.4 (63)                     | 0.53    |
| <b>Outcomes</b>              |                                     |                               |         |
| In-hospital mortality        | 5.6 (19)                            | 8.1 (20)                      | 0.24    |
| ICU admission                | 50.2 (170)                          | 51.2 (127)                    | 0.80    |
| Surgical procedure           | 35.4 (120)                          | 29.4 (73)                     | 0.13    |
| Air transport, interfacility | 18.6 (63)                           | 18.2 (45)                     | 0.91    |
| MEWS deterioration           | 21.9 (72)                           | 21.2 (52)                     | 0.99    |
| Secondary overtriage         | 21.5 (73)                           | 22.2 (55)                     | 0.85    |

\*Data are presented as median (IQR).

ICU, intensive care unit; GSW, gunshot wound. Secondary overtriage: injury severity score < 10, hospital LOS < 1 day, and discharged home.

**Table 2.** Clinical and transit outcomes by pre-transfer modified early warning score (MEWS)

| MEWS    | MEWS<br>% (n) | Mortality         | ICU<br>admission  | Surgical<br>procedure | Air<br>transport  | MEWS<br>deteriora<br>tion | Secondary<br>over-triage |
|---------|---------------|-------------------|-------------------|-----------------------|-------------------|---------------------------|--------------------------|
| 0 or 1  | 69.6 (236)    | 2.1%              | 45.8%             | 31.8 %                | 14.0%             | 19.3%                     | 22.5%                    |
| 2       | 13.6 (46)     | 4.4%              | 52.2%             | 45.7%                 | 23.9%             | 34.9%                     | 23.9%                    |
| 3       | 5.6 (19)      | 10.5%             | 52.6%             | 36.8%                 | 15.8%             | 5.9%                      | 10.5%                    |
| 4       | 5.6 (19)      | 15.8%             | 63.2%             | 42.1%                 | 15.6%             | 22.2%                     | 26.3%                    |
| 5       | 3.5 (12)      | 16.7%             | 75.0%             | 41.7%                 | 66.7%             | 8.3%                      | 16.7%                    |
| ≥ 6     | 2.1 (7)       | 71.4%             | 100%              | 57.1%                 | 71.4%             | 20.0%                     | 0%                       |
| p value |               | <b>&lt; 0.001</b> | <b>&lt; 0.001</b> | 0.07                  | <b>&lt; 0.001</b> | 0.65                      | 0.27                     |

Analyzed with Cochran-Armitage trend test

ICU, intensive care unit. Secondary overtriage: injury severity score < 10, hospital LOS < 1 day, and discharged home

**Table 3.** Association between clinical outcomes with pre-transfer modified early warning score (MEWS) threshold of ≥ 4

| Outcomes, % (n)              | MEWS < 4,<br>n=301 | MEWS ≥ 4,<br>n=38 | OR* (95% CI)     | P value           |
|------------------------------|--------------------|-------------------|------------------|-------------------|
| In-hospital mortality        | 3.0 (9)            | 26.2 (10)         | 11.6 (4.4, 30.9) | <b>&lt; 0.001</b> |
| ICU admission                | 47.2 (142)         | 73.7 (28)         | 3.1 (1.5, 6.7)   | <b>0.003</b>      |
| Surgical procedure           | 34.2 (103)         | 44.7 (17)         | 1.6 (0.8, 3.1)   | 0.20              |
| Air transport, interfacility | 15.6 (47)          | 42.1 (16)         | 3.9 (1.9, 8.0)   | <b>&lt; 0.001</b> |
| MEWS deterioration           | 21.0 (57)          | 17.1 (6)          | 0.7 (0.3, 1.7)   | 0.43              |
| Secondary overtriage         | 21.9 (66)          | 18.4 (7)          | 0.8 (0.3, 1.9)   | 0.62              |

\*OR, Odds ratio for MEWS ≥ 4 vs. MEWS < 4, analyzed with univariate logistic regression

ICU, intensive care unit. Secondary overtriage: injury severity score < 10, hospital LOS < 1 day, and discharged home



1  
2  
3 **Figure Legends**  
4

5 **Figure 1.** Modified early warning score (MEWS)  
6

7  
8 **Figure 2.** Receiver operator characteristic (ROC) curves for mortality (a) and ICU admission (b).  
9  
10  
11  
12  
13  
14  
15  
16  
17  
18  
19  
20  
21  
22  
23  
24  
25  
26  
27  
28  
29  
30  
31  
32  
33  
34  
35  
36  
37  
38  
39  
40  
41  
42  
43  
44  
45  
46  
47  
48  
49  
50  
51  
52  
53  
54  
55  
56  
57  
58  
59  
60

For peer review only

1  
2  
3 **Acknowledgements:** None.  
4

5 **Author contributions:** MG and JJ conceived the study. KS and JJ designed the study. KS  
6 performed the statistical analysis and drafted the manuscript. JJ was involved in data selection  
7 and data collection. MG, MC and DBO contributed substantially to its revision. DBO takes  
8 responsibility for the manuscript as a whole.  
9  
10  
11  
12

13 **Competing interests:** None.  
14

15 **Sources of funding:** This research received no specific grant from any funding agency in the  
16 public, commercial or not-for-profit sectors.  
17  
18  
19  
20

21 **Presentation:** This study was presented at the 75th Annual meeting of the American Association  
22 for the Surgery of Trauma in September 2016 in Haikoloa, HI.  
23  
24  
25  
26

27 **Permissions:** None.  
28

29 **Data sharing:** Data are available from corresponding author DBO.  
30

31 **Research reporting checklist:** STROBE statement checklist complete.  
32  
33  
34  
35  
36  
37  
38  
39  
40  
41  
42  
43  
44  
45  
46  
47  
48  
49  
50  
51  
52  
53  
54  
55  
56  
57  
58  
59  
60

## REFERENCES

1. Centers for Disease Control and Prevention. National Center for Injury Prevention and Control. Injury Prevention and Control- leading causes of death. , 2015.
2. Centers for Disease Control and Prevention. Guidelines for field triage of trauma patients. Morbidity and Mortality Weekly Report. January 13, 2012, 2011.
3. American College of Surgeons Committee on Trauma. Resources for the optimal care of the injured patient. Chicago, IL: American College of Surgeons, 2014.
4. Fullerton JN, Price CL, Silvey NE, et al. Is the Modified Early Warning Score (MEWS) superior to clinician judgement in detecting critical illness in the pre-hospital environment? *Resuscitation* 2012;83(5):557-62. doi: 10.1016/j.resuscitation.2012.01.004
5. Subbe CP, Kruger M, Rutherford P, et al. Validation of a modified Early Warning Score in medical admissions. *QJM* 2001;94(10):521-6.
6. Patel MS, Jones MA, Jiggins M, et al. Does the use of a "track and trigger" warning system reduce mortality in trauma patients? *Injury* 2011;42(12):1455-9. doi: 10.1016/j.injury.2011.05.030 [published Online First: 2011/06/24]
7. Kelly CA, Upex A, Bateman DN. Comparison of consciousness level assessment in the poisoned patient using the alert/verbal/painful/unresponsive scale and the Glasgow Coma Scale. *Annals of emergency medicine* 2004;44(2):108-13. doi: 10.1016/s0196064404003105 [published Online First: 2004/07/28]
8. McNarry AF, Goldhill DR. Simple bedside assessment of level of consciousness: comparison of two simple assessment scales with the Glasgow Coma scale. *Anaesthesia* 2004;59(1):34-7. [published Online First: 2003/12/23]

- 1  
2  
3  
4  
5  
6  
7  
8  
9  
10  
11  
12  
13  
14  
15  
16  
17  
18  
19  
20  
21  
22  
23  
24  
25  
26  
27  
28  
29  
30  
31  
32  
33  
34  
35  
36  
37  
38  
39  
40  
41  
42  
43  
44  
45  
46  
47  
48  
49  
50  
51  
52  
53  
54  
55  
56  
57  
58  
59  
60
9. Raman S, Sreenivas V, Puliye J, et al. Comparison of alert verbal painful unresponsiveness scale and the Glasgow Coma Score. *Indian pediatrics* 2011;48(4):331-2. [published Online First: 2011/05/03]
10. Wasserman EB, Shah MN, Jones CM, et al. Identification of a neurologic scale that optimizes EMS detection of older adult traumatic brain injury patients who require transport to a trauma center. *Prehospital emergency care : official journal of the National Association of EMS Physicians and the National Association of State EMS Directors* 2015;19(2):202-12. doi: 10.3109/10903127.2014.959225 [published Online First: 2014/10/08]
11. Zdravcevic FJ, Tien L, Robertson-Dick BJ, et al. Comparison of mental-status scales for predicting mortality on the general wards. *Journal of hospital medicine* 2015;10(10):658-63. doi: 10.1002/jhm.2415 [published Online First: 2015/09/17]
12. Leung SC, Leung LP, Fan KL, et al. Can prehospital Modified Early Warning Score identify non-trauma patients requiring life-saving intervention in the emergency department? *Emergency medicine Australasia : EMA* 2016;28(1):84-9. doi: 10.1111/1742-6723.12501
13. Gu M, Fu Y, Li C, et al. [The value of modified early warning score in predicting early mortality of critically ill patients admitted to emergency department]. *Zhonghua Wei Zhong Bing Ji Jiu Yi Xue* 2015;27(8):687-90. doi: 10.3760/cma.j.issn.2095-4352.2015.08.014
14. Reini K, Fredrikson M, Oscarsson A. The prognostic value of the Modified Early Warning Score in critically ill patients: a prospective, observational study. *European journal of anaesthesiology* 2012;29(3):152-7. doi: 10.1097/EJA.0b013e32835032d8 [published Online First: 2012/01/26]

- 1  
2  
3  
4  
5  
6  
7  
8  
9  
10  
11  
12  
13  
14  
15  
16  
17  
18  
19  
20  
21  
22  
23  
24  
25  
26  
27  
28  
29  
30  
31  
32  
33  
34  
35  
36  
37  
38  
39  
40  
41  
42  
43  
44  
45  
46  
47  
48  
49  
50  
51  
52  
53  
54  
55  
56  
57  
58  
59  
60
15. Patel A, Hassan S, Ullah A, et al. Early triaging using the Modified Early Warning Score (MEWS) and dedicated emergency teams leads to improved clinical outcomes in acute emergencies. *Clinical medicine (London, England)* 2015;15 Suppl 3:s3. doi: 10.7861/clinmedicine.15-3-s3
16. Kruisselbrink R, Kwizera A, Crowther M, et al. Modified Early Warning Score (MEWS) Identifies Critical Illness among Ward Patients in a Resource Restricted Setting in Kampala, Uganda: A Prospective Observational Study. *PloS one* 2016;11(3):e0151408. doi: 10.1371/journal.pone.0151408
17. The EAST Practice Management Guidelines Work Group. Practice Management Guidelines for the Appropriate Triage of the Victim of Trauma: Eastern Association for the Surgery of Trauma, 2010.

| Modified Early Warning Score   |      |       |        |         |                |               |              |
|--------------------------------|------|-------|--------|---------|----------------|---------------|--------------|
| Vital sign                     | 3    | 2     | 1      | 0       | 1              | 2             | 3            |
| Systolic blood pressure (mmHg) | < 70 | 71-80 | 81-100 | 101-199 |                | ≥ 200         |              |
| Heart rate (bpm)               |      | < 40  | 41-50  | 51-100  | 101-110        | 111-129       | ≥ 130        |
| Respiratory rate (bpm)         |      | < 9   |        | 9-14    | 15-20          | 21-29         | ≥ 30         |
| Temperature (C)                |      | < 35  |        | 35-38.4 |                | ≥ 38.5        |              |
| AVPU                           |      |       |        | Alert   | React to Voice | React to Pain | Unresponsive |
| Glasgow Coma Scale             |      |       |        | 14-15   | 10-13          | 4-9           | 3            |

Figure 1. Modified early warning score (MEWS)

361x270mm (72 x 72 DPI)

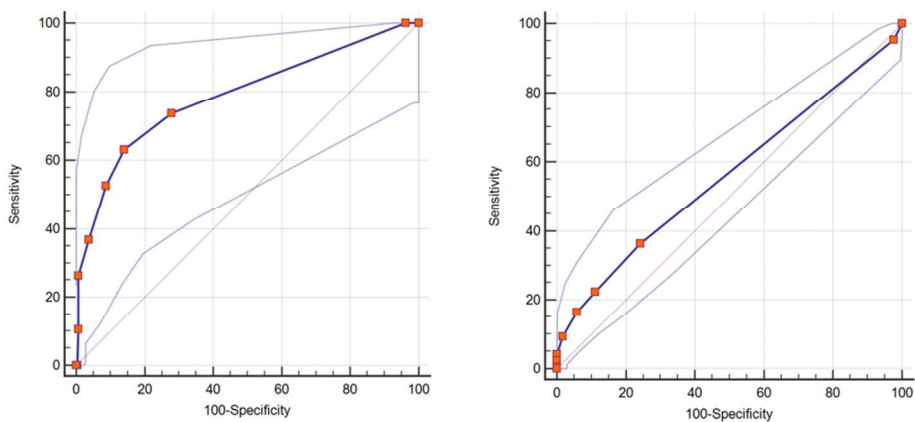

**A** Mortality

**B** ICU admission

Figure 2. Receiver operator characteristic (ROC) curves for mortality (a) and ICU admission (b)

361x270mm (72 x 72 DPI)

ew only

1  
2  
3  
4  
5  
6  
7  
8  
9  
10  
11  
12  
13  
14  
15  
16  
17  
18  
19  
20  
21  
22  
23  
24  
25  
26  
27  
28  
29  
30  
31  
32  
33  
34  
35  
36  
37  
38  
39  
40  
41  
42  
43  
44  
45  
46  
47  
48  
49  
50  
51  
52  
53  
54  
55  
56  
57  
58  
59  
60

# BMJ Open

## A RETROSPECTIVE COHORT STUDY OF THE UTILITY OF THE MODIFIED EARLY WARNING SCORE FOR INTERFACILITY TRANSFER OF PATIENTS WITH TRAUMATIC INJURY

|                                    |                                                                                                                                                                                                                                                                                                                                                                 |
|------------------------------------|-----------------------------------------------------------------------------------------------------------------------------------------------------------------------------------------------------------------------------------------------------------------------------------------------------------------------------------------------------------------|
| Journal:                           | <i>BMJ Open</i>                                                                                                                                                                                                                                                                                                                                                 |
| Manuscript ID                      | bmjopen-2017-016143.R1                                                                                                                                                                                                                                                                                                                                          |
| Article Type:                      | Research                                                                                                                                                                                                                                                                                                                                                        |
| Date Submitted by the Author:      | 13-Mar-2017                                                                                                                                                                                                                                                                                                                                                     |
| Complete List of Authors:          | Salottolo, Kristin; Swedish Medical Center, Trauma Research<br>Carrick, Matthew; The Medical Center of Plano, Trauma research Dept<br>Johnson, Jacob; The Medical Center of Plano, Trauma research Dept<br>Gamber, Mark; The Medical Center of Plano, Trauma research Dept<br>Bar-Or, David; Swedish Medical Center, Trauma Research; Swedish<br>Medical Center |
| <b>Primary Subject<br>Heading</b>: | Emergency medicine                                                                                                                                                                                                                                                                                                                                              |
| Secondary Subject Heading:         | Medical management, Surgery                                                                                                                                                                                                                                                                                                                                     |
| Keywords:                          | ACCIDENT & EMERGENCY MEDICINE, Adult intensive & critical care <<br>INTENSIVE & CRITICAL CARE, TRAUMA MANAGEMENT                                                                                                                                                                                                                                                |
|                                    |                                                                                                                                                                                                                                                                                                                                                                 |

SCHOLARONE™  
Manuscripts



1  
2  
3 **A RETROSPECTIVE COHORT STUDY OF THE UTILITY OF THE MODIFIED**  
4  
5 **EARLY WARNING SCORE FOR INTERFACILITY TRANSFER OF PATIENTS WITH**  
6  
7  
8 **TRAUMATIC INJURY**  
9

10 Kristin Salottolo, MPH<sup>1,2,3,4</sup>; Matthew Carrick, MD<sup>3</sup>; Jacob Johnson, RN<sup>3</sup>; Mark Gamber, DO<sup>3</sup>;

11  
12 David Bar-Or, MD<sup>1,2,3,4</sup>

13  
14  
15 <sup>1</sup>Trauma Research Department, Swedish Medical Center, Englewood, CO 80113 USA

16  
17 <sup>2</sup>Trauma Research Department, St. Anthony Central Hospital, Denver, CO 80204 USA

18  
19 <sup>3</sup>Trauma Research Department, The Medical Center of Plano, Plano, TX 75075 USA

20  
21 <sup>4</sup>Trauma Research Department, Penrose Hospital, Colorado Springs, CO 80907 USA  
22  
23  
24  
25  
26

27 **Word Count:** 2,502

28  
29 **Abstract word count:** 299

30  
31 **Tables/figures:** 5

32  
33  
34 **Keywords:** Accident and emergency medicine; adult intensive and critical care; trauma  
35  
36 management  
37  
38  
39  
40

41 **Author of correspondence and reprints:**

42  
43 David Bar-Or, MD

44  
45 [dbaror@ampiopharma.com](mailto:dbaror@ampiopharma.com)

46  
47  
48 500 E. Hampden Ave, Suite 4-454

49  
50 Swedish Medical Center, Englewood, CO 80113 USA

51  
52 Office: (303) 788-4089  
53  
54  
55  
56  
57  
58  
59  
60

**ABSTRACT**

**Objective:** The modified early warning score (MEWS) is a “track and trigger” score utilizing routine physiologic vital signs. The objective is to determine if the pre-transfer MEWS can be used for predicting outcomes in trauma patients requiring interfacility transfer to higher levels of care.

**Design, setting, participants:** Retrospective study of consecutively transferred trauma patients into a level II trauma center from 2013-2014.

**Interventions:** None.

**Outcome measures:** Mortality, ICU admission, operative procedure, MEWS deterioration in-transit, air transport interfacility, secondary overtriage (low injury severity score < 10, LOS < 1 day, discharged home), and severe injury (injury severity score  $\geq$  16). The association between the pre-transfer MEWS and outcomes were analyzed with Cochran-Armitage trend tests, ROC curves, and univariate logistic regression.

**Results:** There were 587 transferred patients; outcomes were reported in 339 patients with complete data on all 5 vital signs used to calculate the MEWS. The MEWS ranged from 0-9 (median of 1). There was a significant linear relationship between MEWS and study outcomes, especially mortality, ICU admission, air medical transport, and severe injury ( $p < 0.001$  for all). A threshold score  $\geq 4$  was identified by ROC analysis; 11.2% of patients had MEWS  $\geq 4$ . Outcomes were significantly worse in patients with MEWS  $\geq 4$  vs.  $< 4$ : mortality (26.2% vs. 3.0%, OR = 11.59,  $p < 0.001$ ); ICU admission (73.7% vs. 47.2%, OR = 3.14,  $p = 0.003$ ); air transfer (42.1% vs. 15.6%, OR=3.93,  $p < 0.001$ ); severe injury (59.5% vs. 27.2%, OR=3.9,  $p < 0.001$ ). The MEWS was not associated with surgery, in-transit MEWS deterioration, or secondary overtriage.

1  
2  
3 **Conclusion:** Pre-transfer MEWS  $\geq 4$  may be utilized by the receiving facility for predicting  
4 injury severity, mortality, air transport, and ICU resource utilization. In the interfacility transport  
5 setting, the MEWS may be useful for identifying patients with less obvious need for transfer or  
6 requiring more expeditious transfer.  
7  
8  
9  
10  
11  
12  
13  
14  
15  
16  
17  
18  
19  
20  
21  
22  
23  
24  
25  
26  
27  
28  
29  
30  
31  
32  
33  
34  
35  
36  
37  
38  
39  
40  
41  
42  
43  
44  
45  
46  
47  
48  
49  
50  
51  
52  
53  
54  
55  
56  
57  
58  
59  
60

For peer review only

1  
2  
3 **Article Summary:** Strengths and limitations of this study  
4

- 5
- 6 • Strength: The utility of the modified early warning score (MEWS), a “track and trigger”  
7 score comprised of common physiologic vital signs, has been previously described for  
8 risk deterioration in ED settings, but its utility has not been examined during interfacility  
9 transfer.  
10
  - 11 • Limitation: Emergency physicians and EMS personnel did not prospectively utilize the  
12 MEWS during the study period so our findings need to be considered in combination  
13 with clinical judgment.  
14
  - 15 • Limitation: There was a considerable amount of missing vital signs at the transferring  
16 facility, resulting in nearly half of patients being removed from our outcomes analysis,  
17 although there were no differences in demographics, vital signs, or outcomes in patients  
18 with missing versus complete vital signs.  
19
  - 20 • Limitation: The acuity of the patients was low, which may have prevented more robust  
21 analyses between MEWS and outcomes.  
22
- 23  
24  
25  
26  
27  
28  
29  
30  
31  
32  
33  
34  
35  
36  
37  
38  
39  
40  
41  
42  
43  
44  
45  
46  
47  
48  
49  
50  
51  
52  
53  
54  
55  
56  
57  
58  
59  
60

## INTRODUCTION

Traumatic injury is the leading cause of death in persons under 45 years of age.<sup>1</sup> Emergency medical service (EMS) personnel transported nearly 5 million patients with traumatic injury in 2008 alone.<sup>2</sup> The pre-hospital care, triage and transport of patients with traumatic injury to a trauma center are determined by protocols and guidelines published by the American College of Surgeons (ACS) Committee on Trauma<sup>3</sup> and the Centers for Disease Control and Prevention.<sup>2</sup> However, not all injuries are immediately obvious, and patients are occasionally undertriaged to a lower-level or non-trauma center that requires interfacility EMS transport to a higher-level trauma center for care.

The mode of EMS transport interfacility is determined and requested by the transferring emergency physician. Communication between the transferring physician and the receiving trauma surgeon includes a review of physiologic status, initial management, and discussion on the optimal timing of transfer, such as stabilizing patients prior to transfer. EMS agencies are staffed with providers having a range of training and experience dictating the scope of tasks they can perform, from administration of medications, use of medical devices, performing cardiopulmonary resuscitation, initiating ventilation and intubation, and other monitoring techniques. While there are some criteria to help the transferring physician determine if the trauma patient should be transferred, for example patients with carotid or vertebral injuries, cardiac rupture, and grade IV or V liver injuries,<sup>3</sup> there are no solid guidelines on if, when, and how a patient should be transferred. Field triage guidelines<sup>2,3</sup>, although not explicitly intended for the interfacility transport or ED setting, could be used to aid in interfacility transfer of patients. These available guidelines, however, may not be as useful as a composite score in the interfacility transport setting.

1  
2  
3 The modified early warning score (MEWS) is a “track and trigger” score used for  
4 recognizing patients who are at risk for deterioration and determines degree of illness of the  
5 patient.<sup>4</sup> The initial validation of the MEWS was performed in 709 emergency department  
6 patients and identified MEWS  $\geq 5$  was associated with mortality and admission to the intensive  
7 care unit (ICU).<sup>5</sup>

8  
9  
10 Our objectives were to determine whether the MEWS can be used in the interfacility  
11 transport setting for patients with traumatic injury to detect patients potentially requiring higher  
12 levels of care. Specifically, we examined whether the pre-transfer MEWS was associated with  
13 poor clinical outcomes, transport mode, injury severity, and secondary overtriage.  
14

## 15 16 17 18 19 20 21 22 23 24 25 26 27 **METHODS**

### 28 29 30 **Design, setting and participants**

31 This was a retrospective cohort study that included all consecutively admitted trauma patients  
32 transferred into an ACS verified level II trauma center from another healthcare facility between  
33 January 1, 2013 and December 31, 2014 and followed through discharge of the index  
34 hospitalization. The patient populations were identified from the trauma registry called  
35 TraumaBase® (CDM, Conifer, CO), which is a registry used by the hospital and the State of  
36 Texas to track patients with traumatic injury for epidemiology and prevention studies as well as  
37 for quality assurance and quality improvement. Patients less than 18 years of age were excluded.  
38 We also excluded patients with no vital sign data (n=65, 10.0% of patients). This study received  
39 institutional review board approval with waiver of informed consent from The Medical Center of  
40 Plano Institutional Review Board (study #163).  
41  
42  
43  
44  
45  
46  
47  
48  
49  
50  
51  
52  
53  
54

### 55 56 57 58 59 60 **Modified Early Warning Score**

1  
2  
3 The MEWS is derived from 5 common physiologic vital signs of systolic blood pressure (SBP,  
4 mm Hg), heart rate (HR, beats per minute), respiratory rate (RR, breaths per minute),  
5  
6 temperature (T, Celcius), and AVPU score ("alert, voice, pain, unresponsive"), **Figure 1**. The  
7  
8 Glasgow coma scale is favored to the AVPU in traumatic injury, and the AVPU was derived  
9  
10 from the GCS as follows: A=14-15, V=9-13, P = 4-8, U = 3. This substitution is common  
11  
12 although there is no standard method for estimating GCS from AVPU<sup>6-10</sup>. The MEWS was  
13  
14 calculated as the total of the five subcomponent scores (**figure 1**). Scores range from 0 to a  
15  
16 maximum of 14.  
17  
18  
19  
20  
21

22 The pre-transfer MEWS was calculated using vital signs from the transferring facility  
23  
24 (obtained from the transfer facility record), before interfacility transport. The post-transfer  
25  
26 MEWS was calculated from vital signs collected on arrival to the receiving facility.  
27  
28

### 29 **Covariates and outcomes**

30  
31 Clinical outcomes included in-hospital mortality, intensive care unit (ICU) admission, surgical  
32  
33 procedure, EMS transport mode (air medical vs. ground transport), MEWS deterioration (an  
34  
35 increase in MEWS during transit, calculated as the difference between pre-transfer MEWS and  
36  
37 post-transfer MEWS), secondary overtriage (injury severity score (ISS) < 10, hospital LOS < 1  
38  
39 day, and discharged home), and severe injury (injury severity score (ISS) ≥ 16).  
40  
41  
42

43 The following demographic and clinical information was abstracted from the registry:  
44  
45 vital sign information (vital sign location, timing, and values before interfacility transport and on  
46  
47 arrival at the receiving facility); demographics (age, gender, race); injury severity measures  
48  
49 (abbreviated injury scale score, ISS, anatomic location of injury), and cause of injury. We also  
50  
51 examined the occurrence of in-transit events, defined as a significant change in vital signs during  
52  
53 transport (any normal to abnormal change in SBP, HR, RR, T, and GCS) or procedures  
54  
55  
56  
57  
58  
59  
60

1  
2  
3 performed in transit (e.g. fluid bolus, new or significant change in medication, sedation, or  
4  
5  
6 paralytics, placement of chest tube or central line, needle decompression). Information on in-  
7  
8  
9 transit events were abstracted from detailed, scanned EMS run reports, which were only  
10  
11 available in 149 charts.

## 12 **Analysis**

13  
14  
15 The association between pre-transfer MEWS and outcomes were examined with Cochran-  
16  
17  
18 Armitage trend tests. Receiver operator characteristic (ROC) curves were used to identify an  
19  
20  
21 optimal threshold score; we examined ROC curves for mortality and ICU admission, which were  
22  
23  
24 the outcomes used in the initial validation of the MEWS.<sup>5</sup> This threshold score was examined in  
25  
26  
27 separate logistic regression models for each of our study outcomes to estimate the unadjusted  
28  
29  
30 odds of the threshold score for the outcome. The threshold score was also used to examine the  
31  
32  
33 proportion of patients who did not meet the physiologic criteria outlined in the Guidelines for  
34  
35  
36 triage to a trauma center of  $GCS \leq 13$ ,  $SBP \leq 90$  mm Hg, and respirations  $< 10$  or  $> 29$   
37  
38  
39 breaths/min signaling potential, impending deterioration.<sup>13</sup>

40  
41  
42  
43  
44  
45  
46  
47  
48  
49  
50  
51  
52  
53  
54  
55  
56  
57  
58  
59  
60  
SAS version 9.4 (SAS Institute, Cary, NC) was used for all analyses, and  $p \leq 0.05$  was  
considered statistically significant.

## 43 **RESULTS**

### 46 **Patient characteristics and outcomes**

47  
48  
49  
50  
51  
52  
53  
54  
55  
56  
57  
58  
59  
60  
There were 587 transferred patients in our study. The population had a median (IQR) age of 56  
years (37-74), 60% were male, and the most common cause of injury was due to fall (57%),  
followed by a vehicular crash (28%). Nearly half of patients suffered a head injury (46%),  
although the acuity of neurologic deficit was low with a median GCS was 15 (15-15). Overall,



1  
2  
3 18% were transported interfacility by air medical services. The average distance traveled was 23  
4  
5 miles (range: 7 – 79 miles).  
6  
7

8 The rates of our study outcomes are shown in **table 1**. There was low mortality of less  
9  
10 than 6% among our transferred trauma population, although half of patients were admitted to the  
11  
12 ICU, 35% required surgery, and 31% had a severe injury with ISS  $\geq$  16.  
13

14  
15 Additionally, 17.4% (26/149) experienced an in-transit event. The most common in-  
16  
17 transit events were development of tachycardia or an abnormal RR (n=6 each), followed by  
18  
19 development of hypotension (< 90mm Hg, n=4), administration of fluid bolus (n=4), and GCS  
20  
21 decline of two or more points (n=3).  
22  
23

#### 24 **Modified early warning score**

25  
26 The majority of patients (90%) were not missing any vital signs post-transfer. However, 42%  
27  
28 (n=248) were missing between one and four vital signs pre-transfer (83% of those patients were  
29  
30 missing only 1 vital sign). Thus, only 58% of patients (n=339) had complete data for all 5 vital  
31  
32 signs.  
33  
34

35  
36 We examined whether there were differences in demographics, clinical characteristics,  
37  
38 and outcomes in patients with complete vital sign data (n=339) vs. missing vital sign(s) (n=248),  
39  
40 **table 1**. There were no differences in any covariate or in any study outcome. We also examined  
41  
42 whether there were differences in deterioration of the MEWS vital sign subscores between  
43  
44 patients with complete vital sign data vs. those with missing vital signs; no differences existed  
45  
46 (**table 1**). Still, to be conservative we analyzed the association between pre-transfer MEWS and  
47  
48 outcomes in those with complete vital sign data only (n=339), rather than using multiple  
49  
50 imputation to calculate an imputed MEWS in patients with missing vital sign(s).  
51  
52  
53  
54

#### 55 **MEWS relationship to outcomes**

1  
2  
3 The median (IQR) MEWS was 1 (1-2). As shown in **table 2**, the pre-transfer MEWS showed a  
4 significant, linear relationship with study outcomes of mortality, ICU admission, air transport,  
5 and severe injury. The pre-transfer MEWS was borderline significant for predicting a surgical  
6 procedure.  
7  
8  
9  
10  
11

12 Threshold scores were determined with ROC curves (**figure 2**). The ROC curve for  
13 mortality was clinically and statistically significant (AUROC: 0.79 (95% CI: 0.74-0.83,  $p <$   
14 0.001), identifying a threshold MEWS  $\geq 4$  for predicting mortality with a high specificity of 91.3  
15 (91% of survivors were correctly identified by a pre-transfer MEWS  $< 4$ ) and good sensitivity of  
16 52.6 (53% of patients who expired were correctly identified by a MEWS  $\geq 4$ ), figure 2a. The  
17 ROC curve for ICU admission was weaker but still statistically significant (AUROC: 0.56 (95%  
18 CI: 0.51-0.62,  $p=0.02$ ), demonstrating specificity of 94.1 and sensitivity of 16.5 with a threshold  
19 MEWS  $\geq 4$  on ROC analysis, figure 2b.  
20  
21  
22  
23  
24  
25  
26  
27  
28  
29  
30

31 When the threshold score  $\geq 4$  was modeled for our outcomes, the pre-transfer MEWS  
32 continued to show a significant association with study outcomes of mortality, ICU admission, air  
33 transport, and severe injury (**table 3**).  
34  
35  
36  
37

38 In patients with MEWS  $\geq 4$ , 45% (17/38) did not have abnormal physiologic vital signs  
39 signaling triage to a trauma center by the ACS COT and CDC decision guidelines; further, 63%  
40 (12/19) of patients with a MEWS=4 would not have met the physiologic criteria outlined in the  
41 Guidelines. Outcomes in these twelve patients include one death, seven admissions to the ICU,  
42 five patients requiring surgery, but only three patients transferred by air. Ninety-five percent  
43 (286/301) of patients with MEWS  $< 4$  did not have abnormal vital signs per the guidelines.  
44  
45  
46  
47  
48  
49  
50  
51  
52  
53  
54

## 55 DISCUSSION

56  
57  
58  
59  
60

1  
2  
3 Our study examined patients with traumatic injury requiring interfacility transfer, demonstrating  
4 that a MEWS  $\geq 4$  calculated prior to interfacility transport is associated with mortality, ICU  
5 admission, air medical transport, and severe injury. In the interfacility transport setting, the  
6 MEWS may act as a more holistic measure that may lessen the chance of underestimating a poor  
7 clinical outcome and delaying or not transferring a patient appropriately. While it may seem  
8 obvious that out-of-range vital signs would increase the odds of an unfavorable outcome, only 21  
9 of 38 patients with MEWS  $\geq 4$  would have met abnormal physiologic criteria by the ACS COT  
10 and CDC decision guidelines.<sup>13</sup> In this setting, the MEWS may be useful for identifying patients  
11 with less obvious need for transfer.  
12  
13  
14  
15  
16  
17  
18  
19  
20  
21  
22  
23

24 The main limitation of the study is that emergency physicians and EMS personnel did not  
25 prospectively utilize the MEWS during the study period so our findings need to be considered in  
26 combination with clinical judgment. Fullerton et al. observed that the MEWS in combination  
27 with clinical judgment increases the utility of the MEWS in a pre-hospital setting.<sup>4</sup> At least one  
28 study reported that implementing the MEWS in a trauma setting did not result in a statistically  
29 significant reduction in mortality ( $p=0.09$ ).<sup>11</sup> A prospective study that factors in clinical  
30 judgment will need to validate this threshold of  $\geq 4$  to determine if it leads to more appropriate  
31 transfer and improved outcomes.  
32  
33  
34  
35  
36  
37  
38  
39  
40  
41  
42

43 Additional limitations are as follows: There was a considerable amount of missing vital  
44 sign data at the transferring facility, resulting in 47% of patients being removed from our  
45 outcomes analysis. While there were no differences in the characteristics or outcomes of patients  
46 with complete data and patients with incomplete data, there may be some residual bias in  
47 excluding patients with one or more missing vital signs. This limitation also suggests a need for  
48 more efficient, routine collection of pre-transport vital signs and EMS reports to receiving  
49  
50  
51  
52  
53  
54  
55  
56  
57  
58  
59  
60

1  
2  
3 facilities. Next, the acuity of the patients was low, which may have prevented more robust  
4  
5 analyses between MEWS and outcomes. The median pre-transfer MEWS was only 1. This might  
6  
7 not be a limitation as much as it suggests that guidelines for the pre-hospital triage and transport  
8  
9 of patients attempts to minimize under-triage of trauma patients at the expense of over-triage.  
10  
11 Further study is needed to examine the MEWS for inter-hospital transport to level I trauma  
12  
13 centers. Patients transferred into level I trauma centers theoretically have higher acuity injuries  
14  
15 and more severe MEWS pre-hospital, which may help with the robustness of these analyses.  
16  
17 Finally, the AVPU component of the MEWS score was estimated from the GCS. There are no  
18  
19 standard criteria for estimating GCS from AVPU;<sup>6-10</sup> using a different cut-off might result in  
20  
21 different MEWS scores.  
22  
23  
24  
25  
26

27 Literature published within the past few years have identified a range of MEWS values  
28  
29 associated with poor outcomes. Such studies include a pre-hospital MEWS  $\geq 3$  for requiring a  
30  
31 life-saving intervention,<sup>12</sup> MEWS  $\geq 5$  with early mortality in the ED,<sup>13</sup> MEWS  $\geq 6$  for mortality  
32  
33 in the ICU,<sup>14</sup> MEWS  $\geq 7$  for rapid response team and cardiac arrest in the ED.<sup>15</sup> Still others have  
34  
35 used the MEWS  $\geq 5$  identified by Subbe et al. and examined this threshold in other settings, such  
36  
37 as in developing countries.<sup>16</sup> A MEWS threshold  $\geq 4$  was associated with poor outcomes in  
38  
39 patients requiring interfacility transfer in our study. Higher scores may lead to more efficient  
40  
41 secondary triage and transfer of patients to a higher-level trauma center who are at risk for  
42  
43 deterioration and poor outcomes. Using an integrated score such as the MEWS might help avoid  
44  
45 situations where a clinician might dismiss a potentially problematic clinical presentation as not  
46  
47 requiring an interfacility transfer. Additional applications of the MEWS include determining  
48  
49 when to transfer a patient: a MEWS  $\geq 4$  suggests expeditious transfer, rather than a thorough  
50  
51 work-up until the discovery of an injury that is not admissible at the transferring facility. Another  
52  
53  
54  
55  
56  
57  
58  
59  
60

1  
2  
3 example is from a bed capacity sense: the house supervisor may be able to determine if a patient  
4 may need a bed, and if the ICU is full at the transferring or receiving facility.  
5  
6

7  
8 The EAST practice management guidelines on the triage of the trauma patient describe  
9  
10 77 articles of pre-hospital triage of adult patients, 9 articles of pre-hospital triage of pediatric  
11 patients, and 16 articles of in-hospital triage of trauma patients.<sup>17</sup> There are no guidelines or  
12 referenced articles on the *interfacility* triage and transport of patients. Our findings contribute to  
13 the literature in that we identify a simple score utilizing common vital signs that can aid in early  
14 recognition of patients at risk for poor clinical outcomes for triage and transport in the inter-  
15 facility setting. Our findings suggest the pre-transfer MEWS can aid in interfacility triage and  
16 transport, to be utilized for predicting in-hospital mortality, allotment of ICU resources, for  
17 identifying patients requiring interfacility transport by air, and for recognizing severe injuries,  
18 particularly with scores  $\geq 4$ . The pre-transfer MEWS appeared to be less useful in identifying  
19 secondary overtriage and risk for deterioration during interfacility transfer, although the utility of  
20 the pre-transfer MEWS for these outcomes requires further study in populations with higher  
21 acuity injuries.  
22  
23  
24  
25  
26  
27  
28  
29  
30  
31  
32  
33  
34  
35  
36  
37  
38  
39  
40  
41  
42  
43  
44  
45  
46  
47  
48  
49  
50  
51  
52  
53  
54  
55  
56  
57  
58  
59  
60

1  
2  
3  
4  
5  
6  
7  
8  
9  
10  
11  
12  
13  
14  
15  
16  
17  
18  
19  
20  
21  
22  
23  
24  
25  
26  
27  
28  
29  
30  
31  
32  
33  
34  
35  
36  
37  
38  
39  
40  
41  
42  
43  
44  
45  
46  
47  
48  
49  
50  
51  
52  
53  
54  
55  
56  
57  
58  
59  
60

## Tables

**Table 1.** Descriptive statistics by study population, defined by vital sign missingness

| % (n)                                                               | All 5 vital signs available (n=339) | Missing vital sign(s) (n=248) | P value |
|---------------------------------------------------------------------|-------------------------------------|-------------------------------|---------|
| <b>Demographics</b>                                                 |                                     |                               |         |
| Age, years*                                                         | 54 (35-74)                          | 57 (40.5-78)                  | 0.05    |
| Male Gender                                                         | 62.2 (211)                          | 56.9 (141)                    | 0.19    |
| White race                                                          | 73.5 (249)                          | 78.2 (194)                    | 0.18    |
| Fall cause of injury                                                | 55.5 (188)                          | 58.1 (144)                    | 0.89    |
| Head injury                                                         | 44.0 (149)                          | 48.9 (121)                    | 0.25    |
| Neck or spine injury                                                | 14.5 (49)                           | 16.5 (41)                     | 0.49    |
| Chest injury                                                        | 9.7 (33)                            | 9.7 (24)                      | 0.98    |
| Limb injury                                                         | 27.7 (94)                           | 25.4 (63)                     | 0.53    |
| <b>MEWS subscore change from transferring to receiving facility</b> |                                     |                               |         |
| Deterioration in SBP                                                | 3.83 (13)                           | 3.23 (8)                      | 0.76    |
| Deterioration in HR                                                 | 11.80 (40)                          | 14.11 (35)                    | 0.34    |
| Deterioration in RR                                                 | 9.44 (32)                           | 8.87 (22)                     | 1.0     |
| Deterioration in Temp                                               | 0.29 (1)                            | 0 (0)                         | 1.0     |
| Deterioration in GCS                                                | 6.49 (22)                           | 2.02 (5)                      | 0.07    |
| <b>Outcomes</b>                                                     |                                     |                               |         |
| In-hospital mortality                                               | 5.6 (19)                            | 8.1 (20)                      | 0.24    |
| ICU admission                                                       | 50.2 (170)                          | 51.2 (127)                    | 0.80    |
| Surgical procedure                                                  | 35.4 (120)                          | 29.4 (73)                     | 0.13    |
| Air transport, interfacility                                        | 18.6 (63)                           | 18.2 (45)                     | 0.91    |
| MEWS deterioration                                                  | 21.9 (72)                           | 21.2 (52)                     | 0.99    |
| Secondary overtriage                                                | 21.5 (73)                           | 22.2 (55)                     | 0.85    |
| Severe injury (ISS $\geq$ 16)                                       | 30.75 (103)                         | 32.39 (80)                    | 0.67    |

\*Data are presented as median (IQR).

ICU, intensive care unit; GSW, gunshot wound; ISS, injury severity score. Secondary overtriage:

ISS < 10, hospital LOS < 1 day, and discharged home.

**Table 2.** Clinical and transit outcomes by pre-transfer modified early warning score (MEWS)

| MEWS     | MEWS<br>% (n) | Mortality         | ICU<br>admission  | Surgical<br>procedure | Air<br>transport  | MEWS<br>deteriora<br>tion | Secondary<br>over-triage | Severe<br>injury<br>(ISS $\geq$ 16) |
|----------|---------------|-------------------|-------------------|-----------------------|-------------------|---------------------------|--------------------------|-------------------------------------|
| 0 or 1   | 69.6 (236)    | 2.1%              | 45.8%             | 31.8 %                | 14.0%             | 19.3%                     | 22.5%                    | 24.0%                               |
| 2        | 13.6 (46)     | 4.4%              | 52.2%             | 45.7%                 | 23.9%             | 34.9%                     | 23.9%                    | 32.6%                               |
| 3        | 5.6 (19)      | 10.5%             | 52.6%             | 36.8%                 | 15.8%             | 5.9%                      | 10.5%                    | 52.6%                               |
| 4        | 5.6 (19)      | 15.8%             | 63.2%             | 42.1%                 | 15.6%             | 22.2%                     | 26.3%                    | 61.1%                               |
| 5        | 3.5 (12)      | 16.7%             | 75.0%             | 41.7%                 | 66.7%             | 8.3%                      | 16.7%                    | 41.7%                               |
| $\geq$ 6 | 2.1 (7)       | 71.4%             | 100%              | 57.1%                 | 71.4%             | 20.0%                     | 0%                       | 100%                                |
| p value  |               | <b>&lt; 0.001</b> | <b>&lt; 0.001</b> | 0.07                  | <b>&lt; 0.001</b> | 0.65                      | 0.27                     | <b>&lt; 0.001</b>                   |

Analyzed with Cochran-Armitage trend test

ICU, intensive care unit; ISS, injury severity score. Secondary overtriage: ISS < 10, hospital LOS < 1 day, and discharged home.

**Table 3.** Association between clinical outcomes with pre-transfer modified early warning score (MEWS) threshold of  $\geq$  4

| Outcomes, % (n)               | MEWS < 4,<br>n=301 | MEWS $\geq$ 4,<br>n=38 | OR* (95% CI)     | P value           |
|-------------------------------|--------------------|------------------------|------------------|-------------------|
| In-hospital mortality         | 3.0 (9)            | 26.2 (10)              | 11.6 (4.4, 30.9) | <b>&lt; 0.001</b> |
| ICU admission                 | 47.2 (142)         | 73.7 (28)              | 3.1 (1.5, 6.7)   | <b>0.003</b>      |
| Surgical procedure            | 34.2 (103)         | 44.7 (17)              | 1.6 (0.8, 3.1)   | 0.20              |
| Air transport, interfacility  | 15.6 (47)          | 42.1 (16)              | 3.9 (1.9, 8.0)   | <b>&lt; 0.001</b> |
| MEWS deterioration            | 21.0 (57)          | 17.1 (6)               | 0.7 (0.3, 1.7)   | 0.43              |
| Secondary overtriage          | 21.9 (66)          | 18.4 (7)               | 0.8 (0.3, 1.9)   | 0.62              |
| Severe injury (ISS $\geq$ 16) | 27.2 (81)          | 59.5 (22)              | 3.9 (1.9, 8.0)   | <b>&lt; 0.001</b> |

\*OR, Odds ratio for MEWS  $\geq$  4 vs. MEWS < 4, analyzed with univariate logistic regression

1  
2  
3 ICU, intensive care unit; ISS, injury severity score. Secondary overtriage: ISS < 10, hospital LOS  
4 < 1 day, and discharged home.  
5  
6  
7  
8  
9  
10  
11  
12  
13  
14  
15  
16  
17  
18  
19  
20  
21  
22  
23  
24  
25  
26  
27  
28  
29  
30  
31  
32  
33  
34  
35  
36  
37  
38  
39  
40  
41  
42  
43  
44  
45  
46  
47  
48  
49  
50  
51  
52  
53  
54  
55  
56  
57  
58  
59  
60

For peer review only



1  
2  
3 **Figure Legends**  
4

5 **Figure 1.** Modified early warning score (MEWS)  
6

7  
8 **Figure 2.** Receiver operator characteristic (ROC) curves for mortality (a) and ICU admission (b)  
9  
10  
11  
12  
13  
14  
15  
16  
17  
18  
19  
20  
21  
22  
23  
24  
25  
26  
27  
28  
29  
30  
31  
32  
33  
34  
35  
36  
37  
38  
39  
40  
41  
42  
43  
44  
45  
46  
47  
48  
49  
50  
51  
52  
53  
54  
55  
56  
57  
58  
59  
60

For peer review only

1  
2  
3 **Acknowledgements:** None.  
4

5 **Author contributions:** MG and JJ conceived the study. KS and JJ designed the study. KS  
6  
7 performed the statistical analysis and drafted the manuscript. JJ was involved in data selection  
8  
9 and data collection. MG, MC and DBO contributed substantially to its revision. DBO takes  
10  
11 responsibility for the manuscript as a whole.  
12  
13

14 **Competing interests:** None.  
15

16  
17 **Sources of funding:** This research received no specific grant from any funding agency in the  
18  
19 public, commercial or not-for-profit sectors.  
20  
21

22 **Presentation:** This study was presented at the 75th Annual meeting of the American Association  
23  
24 for the Surgery of Trauma in September 2016 in Haikoloa, HI.  
25  
26

27 **Permissions:** None.  
28

29 **Data sharing:** Data are available from corresponding author DBO.  
30  
31

32 **Research reporting checklist:** STROBE statement checklist complete.  
33  
34  
35  
36  
37  
38  
39  
40  
41  
42  
43  
44  
45  
46  
47  
48  
49  
50  
51  
52  
53  
54  
55  
56  
57  
58  
59  
60

## REFERENCES

1. Centers for Disease Control and Prevention. National Center for Injury Prevention and Control. Injury Prevention and Control- leading causes of death, 2015.
2. Centers for Disease Control and Prevention. Guidelines for field triage of trauma patients. Morbidity and Mortality Weekly Report. January 13, 2012, 2011.
3. American College of Surgeons Committee on Trauma. Resources for the optimal care of the injured patient. Chicago, IL: American College of Surgeons, 2014.
4. Fullerton JN, Price CL, Silvey NE, et al. Is the Modified Early Warning Score (MEWS) superior to clinician judgement in detecting critical illness in the pre-hospital environment? *Resuscitation* 2012;83(5):557-62. doi: 10.1016/j.resuscitation.2012.01.004
5. Subbe CP, Kruger M, Rutherford P, et al. Validation of a modified Early Warning Score in medical admissions. *QJM* 2001;94(10):521-6.
6. Kelly CA, Upex A, Bateman DN. Comparison of consciousness level assessment in the poisoned patient using the alert/verbal/painful/unresponsive scale and the Glasgow Coma Scale. *Annals of emergency medicine* 2004;44(2):108-13. doi: 10.1016/s0196064404003105 [published Online First: 2004/07/28]
7. McNarry AF, Goldhill DR. Simple bedside assessment of level of consciousness: comparison of two simple assessment scales with the Glasgow Coma scale. *Anaesthesia* 2004;59(1):34-7. [published Online First: 2003/12/23]
8. Raman S, Sreenivas V, Puliyeel JM, et al. Comparison of alert verbal painful unresponsiveness scale and the Glasgow Coma Score. *Indian pediatrics* 2011;48(4):331-2. [published Online First: 2011/05/03]

- 1  
2  
3  
4  
5  
6  
7  
8  
9  
10  
11  
12  
13  
14  
15  
16  
17  
18  
19  
20  
21  
22  
23  
24  
25  
26  
27  
28  
29  
30  
31  
32  
33  
34  
35  
36  
37  
38  
39  
40  
41  
42  
43  
44  
45  
46  
47  
48  
49  
50  
51  
52  
53  
54  
55  
56  
57  
58  
59  
60
9. Wasserman EB, Shah MN, Jones CM, et al. Identification of a neurologic scale that optimizes EMS detection of older adult traumatic brain injury patients who require transport to a trauma center. *Prehospital emergency care : official journal of the National Association of EMS Physicians and the National Association of State EMS Directors* 2015;19(2):202-12. doi: 10.3109/10903127.2014.959225 [published Online First: 2014/10/08]
  10. Zadavec FJ, Tien L, Robertson-Dick BJ, et al. Comparison of mental-status scales for predicting mortality on the general wards. *Journal of hospital medicine* 2015;10(10):658-63. doi: 10.1002/jhm.2415 [published Online First: 2015/09/17]
  11. Patel MS, Jones MA, Jiggins M, et al. Does the use of a "track and trigger" warning system reduce mortality in trauma patients? *Injury* 2011;42(12):1455-9. doi: 10.1016/j.injury.2011.05.030 [published Online First: 2011/06/24]
  12. Leung SC, Leung LP, Fan KL, et al. Can prehospital Modified Early Warning Score identify non-trauma patients requiring life-saving intervention in the emergency department? *Emergency medicine Australasia : EMA* 2016;28(1):84-9. doi: 10.1111/1742-6723.12501
  13. Gu M, Fu Y, Li C, et al. [The value of modified early warning score in predicting early mortality of critically ill patients admitted to emergency department]. *Zhonghua Wei Zhong Bing Ji Jiu Yi Xue* 2015;27(8):687-90. doi: 10.3760/cma.j.issn.2095-4352.2015.08.014
  14. Reini K, Fredrikson M, Oscarsson A. The prognostic value of the Modified Early Warning Score in critically ill patients: a prospective, observational study. *European journal of anaesthesiology* 2012;29(3):152-7. doi: 10.1097/EJA.0b013e32835032d8 [published Online First: 2012/01/26]

- 1  
2  
3 15. Patel A, Hassan S, Ullah A, et al. Early triaging using the Modified Early Warning Score  
4  
5 (MEWS) and dedicated emergency teams leads to improved clinical outcomes in acute  
6  
7 emergencies. *Clinical medicine (London, England)* 2015;15 Suppl 3:s3. doi:  
8  
9 10.7861/clinmedicine.15-3-s3  
10  
11  
12 16. Kruisselbrink R, Kwizera A, Crowther M, et al. Modified Early Warning Score (MEWS)  
13  
14 Identifies Critical Illness among Ward Patients in a Resource Restricted Setting in  
15  
16 Kampala, Uganda: A Prospective Observational Study. *PloS one* 2016;11(3):e0151408.  
17  
18 doi: 10.1371/journal.pone.0151408  
19  
20  
21 17. The EAST Practice Management Guidelines Work Group. Practice Management Guidelines  
22  
23 for the Appropriate Triage of the Victim of Trauma: Eastern Association for the Surgery  
24  
25 of Trauma, 2010.  
26  
27  
28  
29  
30  
31  
32  
33  
34  
35  
36  
37  
38  
39  
40  
41  
42  
43  
44  
45  
46  
47  
48  
49  
50  
51  
52  
53  
54  
55  
56  
57  
58  
59  
60

| Modified Early Warning Score   |      |       |        |         |                |               |              |
|--------------------------------|------|-------|--------|---------|----------------|---------------|--------------|
| Vital sign                     | 3    | 2     | 1      | 0       | 1              | 2             | 3            |
| Systolic blood pressure (mmHg) | < 70 | 71-80 | 81-100 | 101-199 |                | ≥ 200         |              |
| Heart rate (bpm)               |      | < 40  | 41-50  | 51-100  | 101-110        | 111-129       | ≥ 130        |
| Respiratory rate (bpm)         |      | < 9   |        | 9-14    | 15-20          | 21-29         | ≥ 30         |
| Temperature (C)                |      | < 35  |        | 35-38.4 |                | ≥ 38.5        |              |
| AVPU                           |      |       |        | Alert   | React to Voice | React to Pain | Unresponsive |
| Glasgow Coma Scale             |      |       |        | 14-15   | 10-13          | 4-9           | 3            |

Figure 1. Modified early warning score (MEWS)

149x62mm (300 x 300 DPI)

1  
2  
3  
4  
5  
6  
7  
8  
9  
10  
11  
12  
13  
14  
15  
16  
17  
18  
19  
20  
21  
22  
23  
24  
25  
26  
27  
28  
29  
30  
31  
32  
33  
34  
35  
36  
37  
38  
39  
40  
41  
42  
43  
44  
45  
46  
47  
48  
49  
50  
51  
52  
53  
54  
55  
56  
57  
58  
59  
60

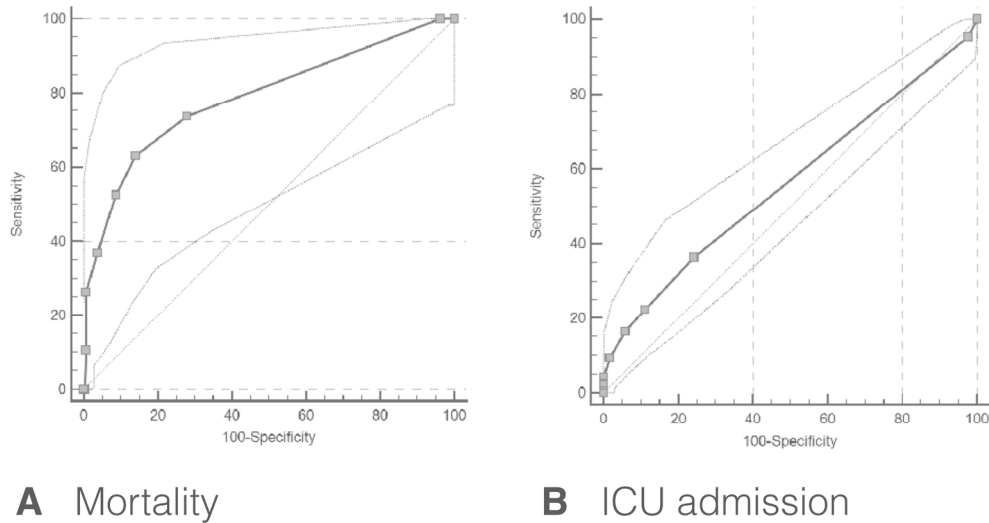

Figure 2. Receiver operator characteristic (ROC) curves for mortality (a) and ICU admission (b)

176x93mm (300 x 300 DPI)

review only

## STROBE Statement—checklist of items that should be included in reports of observational studies

|                              | Item No | Page | Recommendation                                                                                                                                                                                                                                                                                                                                                                                                                                                         |
|------------------------------|---------|------|------------------------------------------------------------------------------------------------------------------------------------------------------------------------------------------------------------------------------------------------------------------------------------------------------------------------------------------------------------------------------------------------------------------------------------------------------------------------|
| Title and abstract           | 1       | 2    | (a) Indicate the study's design with a commonly used term in the title or the abstract                                                                                                                                                                                                                                                                                                                                                                                 |
|                              |         | 2    | (b) Provide in the abstract an informative and balanced summary of what was done and what was found                                                                                                                                                                                                                                                                                                                                                                    |
| <b>Introduction</b>          |         |      |                                                                                                                                                                                                                                                                                                                                                                                                                                                                        |
| Background/rationale         | 2       | 5    | Explain the scientific background and rationale for the investigation being reported                                                                                                                                                                                                                                                                                                                                                                                   |
| Objectives                   | 3       | 6    | State specific objectives, including any prespecified hypotheses                                                                                                                                                                                                                                                                                                                                                                                                       |
| <b>Methods</b>               |         |      |                                                                                                                                                                                                                                                                                                                                                                                                                                                                        |
| Study design                 | 4       | 6    | Present key elements of study design early in the paper                                                                                                                                                                                                                                                                                                                                                                                                                |
| Setting                      | 5       | 6    | Describe the setting, locations, and relevant dates, including periods of recruitment, exposure, follow-up, and data collection                                                                                                                                                                                                                                                                                                                                        |
| Participants                 | 6       | 6    | (a) <i>Cohort study</i> —Give the eligibility criteria, and the sources and methods of selection of participants. Describe methods of follow-up<br><i>Case-control study</i> —Give the eligibility criteria, and the sources and methods of case ascertainment and control selection. Give the rationale for the choice of cases and controls<br><i>Cross-sectional study</i> —Give the eligibility criteria, and the sources and methods of selection of participants |
|                              |         | NA   | (b) <i>Cohort study</i> —For matched studies, give matching criteria and number of exposed and unexposed<br><i>Case-control study</i> —For matched studies, give matching criteria and the number of controls per case                                                                                                                                                                                                                                                 |
| Variables                    | 7       | 7    | Clearly define all outcomes, exposures, predictors, potential confounders, and effect modifiers. Give diagnostic criteria, if applicable                                                                                                                                                                                                                                                                                                                               |
| Data sources/<br>measurement | 8*      | 7    | For each variable of interest, give sources of data and details of methods of assessment (measurement). Describe comparability of assessment methods if there is more than one group                                                                                                                                                                                                                                                                                   |
| Bias                         | 9       | 8-9  | Describe any efforts to address potential sources of bias                                                                                                                                                                                                                                                                                                                                                                                                              |
| Study size                   | 10      | 6    | Explain how the study size was arrived at                                                                                                                                                                                                                                                                                                                                                                                                                              |
| Quantitative variables       | 11      | 8-9  | Explain how quantitative variables were handled in the analyses. If applicable, describe which groupings were chosen and why                                                                                                                                                                                                                                                                                                                                           |
| Statistical methods          | 12      | 8    | (a) Describe all statistical methods, including those used to control for confounding                                                                                                                                                                                                                                                                                                                                                                                  |
|                              |         | 8-9  | (b) Describe any methods used to examine subgroups and interactions                                                                                                                                                                                                                                                                                                                                                                                                    |
|                              |         | 8-9  | (c) Explain how missing data were addressed                                                                                                                                                                                                                                                                                                                                                                                                                            |
|                              |         | NA   | (d) <i>Cohort study</i> —If applicable, explain how loss to follow-up was addressed<br><i>Case-control study</i> —If applicable, explain how matching of cases and controls was addressed<br><i>Cross-sectional study</i> —If applicable, describe analytical methods taking account of sampling strategy                                                                                                                                                              |
|                              |         | NA   | (e) Describe any sensitivity analyses                                                                                                                                                                                                                                                                                                                                                                                                                                  |

Continued on next page



| Results                  | Page |                                                                                                                                                                                                                    |
|--------------------------|------|--------------------------------------------------------------------------------------------------------------------------------------------------------------------------------------------------------------------|
| Participants             | 13*  | 8-9 (a) Report numbers of individuals at each stage of study—eg numbers potentially eligible, examined for eligibility, confirmed eligible, included in the study, completing follow-up, and analysed              |
|                          |      | 8-9 (b) Give reasons for non-participation at each stage                                                                                                                                                           |
|                          |      | (c) Consider use of a flow diagram                                                                                                                                                                                 |
| Descriptive data         | 14*  | 8 (a) Give characteristics of study participants (eg demographic, clinical, social) and information on exposures and potential confounders                                                                         |
|                          |      | 8-9 (b) Indicate number of participants with missing data for each variable of interest                                                                                                                            |
|                          |      | NA (c) <i>Cohort study</i> —Summarise follow-up time (eg, average and total amount)                                                                                                                                |
| Outcome data             | 15*  | 10-12 <i>Cohort study</i> —Report numbers of outcome events or summary measures over time                                                                                                                          |
|                          |      | <i>Case-control study</i> —Report numbers in each exposure category, or summary measures of exposure                                                                                                               |
|                          |      | <i>Cross-sectional study</i> —Report numbers of outcome events or summary measures                                                                                                                                 |
| Main results             | 16   | 11-12 (a) Give unadjusted estimates and, if applicable, confounder-adjusted estimates and their precision (eg, 95% confidence interval). Make clear which confounders were adjusted for and why they were included |
|                          |      | 11 (b) Report category boundaries when continuous variables were categorized                                                                                                                                       |
|                          |      | (c) If relevant, consider translating estimates of relative risk into absolute risk for a meaningful time period                                                                                                   |
| Other analyses           | 17   | NA Report other analyses done—eg analyses of subgroups and interactions, and sensitivity analyses                                                                                                                  |
| <b>Discussion</b>        |      |                                                                                                                                                                                                                    |
| Key results              | 18   | 12 Summarise key results with reference to study objectives                                                                                                                                                        |
| Limitations              | 19   | 14 Discuss limitations of the study, taking into account sources of potential bias or imprecision. Discuss both direction and magnitude of any potential bias                                                      |
| Interpretation           | 20   | 13 Give a cautious overall interpretation of results considering objectives, limitations, multiplicity of analyses, results from similar studies, and other relevant evidence                                      |
| Generalisability         | 21   | 14-15 Discuss the generalisability (external validity) of the study results                                                                                                                                        |
| <b>Other information</b> |      |                                                                                                                                                                                                                    |
| Funding                  | 22   | 17 Give the source of funding and the role of the funders for the present study and, if applicable, for the original study on which the present article is based                                                   |

\*Give information separately for cases and controls in case-control studies and, if applicable, for exposed and unexposed groups in cohort and cross-sectional studies.

**Note:** An Explanation and Elaboration article discusses each checklist item and gives methodological background and published examples of transparent reporting. The STROBE checklist is best used in conjunction with this article (freely available on the Web sites of PLoS Medicine at <http://www.plosmedicine.org/>, Annals of Internal Medicine at <http://www.annals.org/>, and Epidemiology at <http://www.epidem.com/>). Information on the STROBE Initiative is available at [www.strobe-statement.org](http://www.strobe-statement.org).
